# Supplementary material for: Assessment of Antioxidant and Antibacterial Potential of Phenolic Extracts from Post-Distillation Solid Residues of Oregano, Rosemary, Sage, Lemon Balm, and Spearmint
Source: MDPI journal article supplement (doi:10.3390/pr12010140), 2024-01-05
Supplement: s1 [file s1]

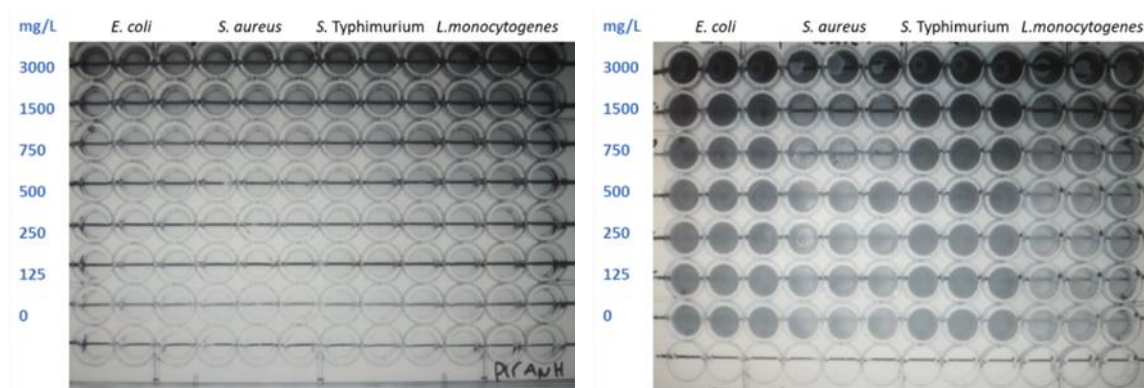

**Figure S1.** Image of 96-well microtiter plates at 0 (left) and 48 h (right) for SR oregano extract. Each bacterium is incubated in three consecutive positions. In the places where there is growth of the bacterium after 48 h, the black line is not visible.

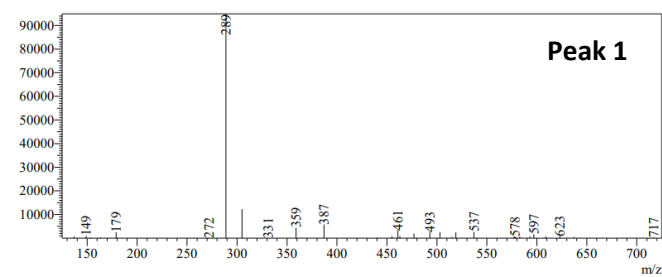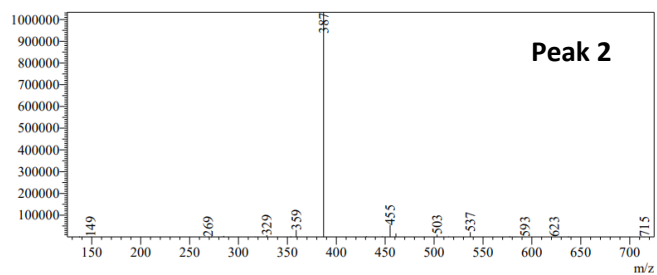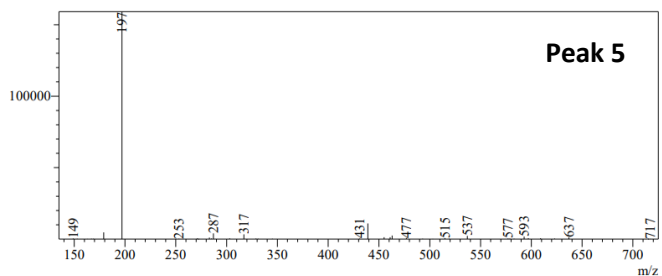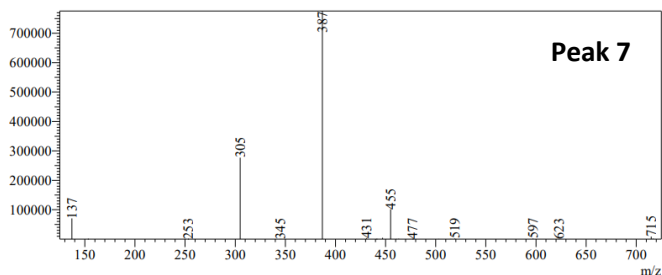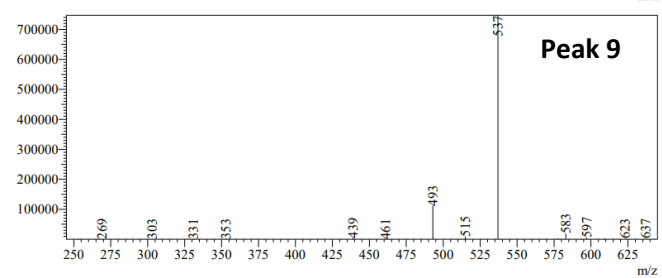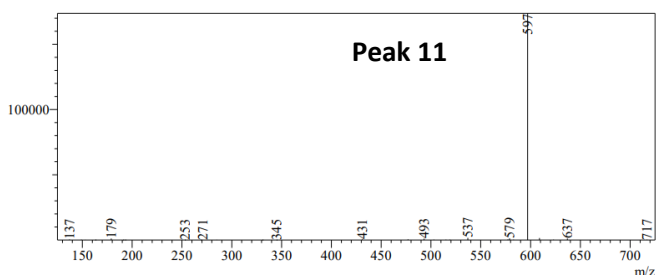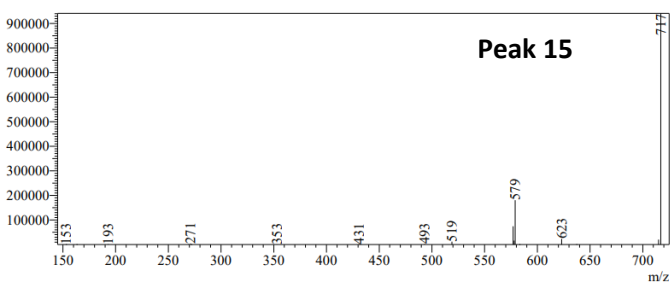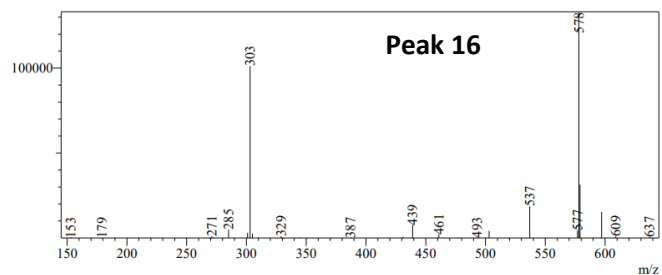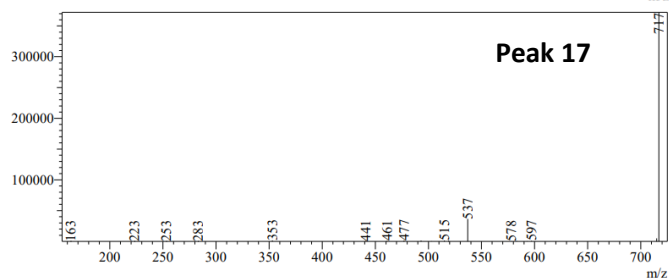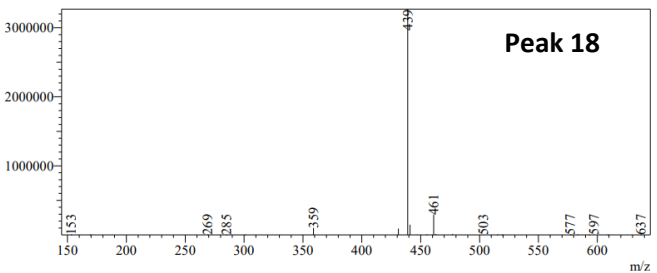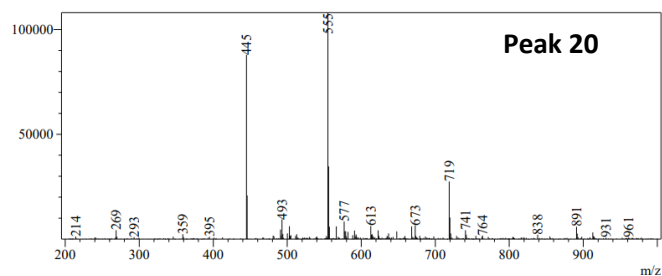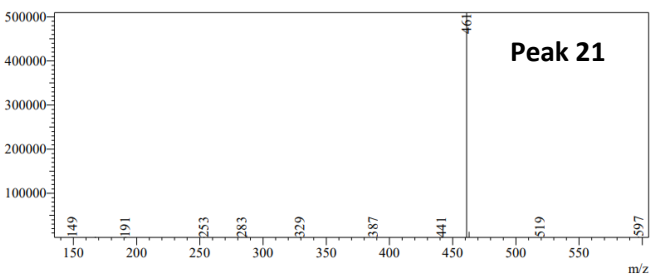

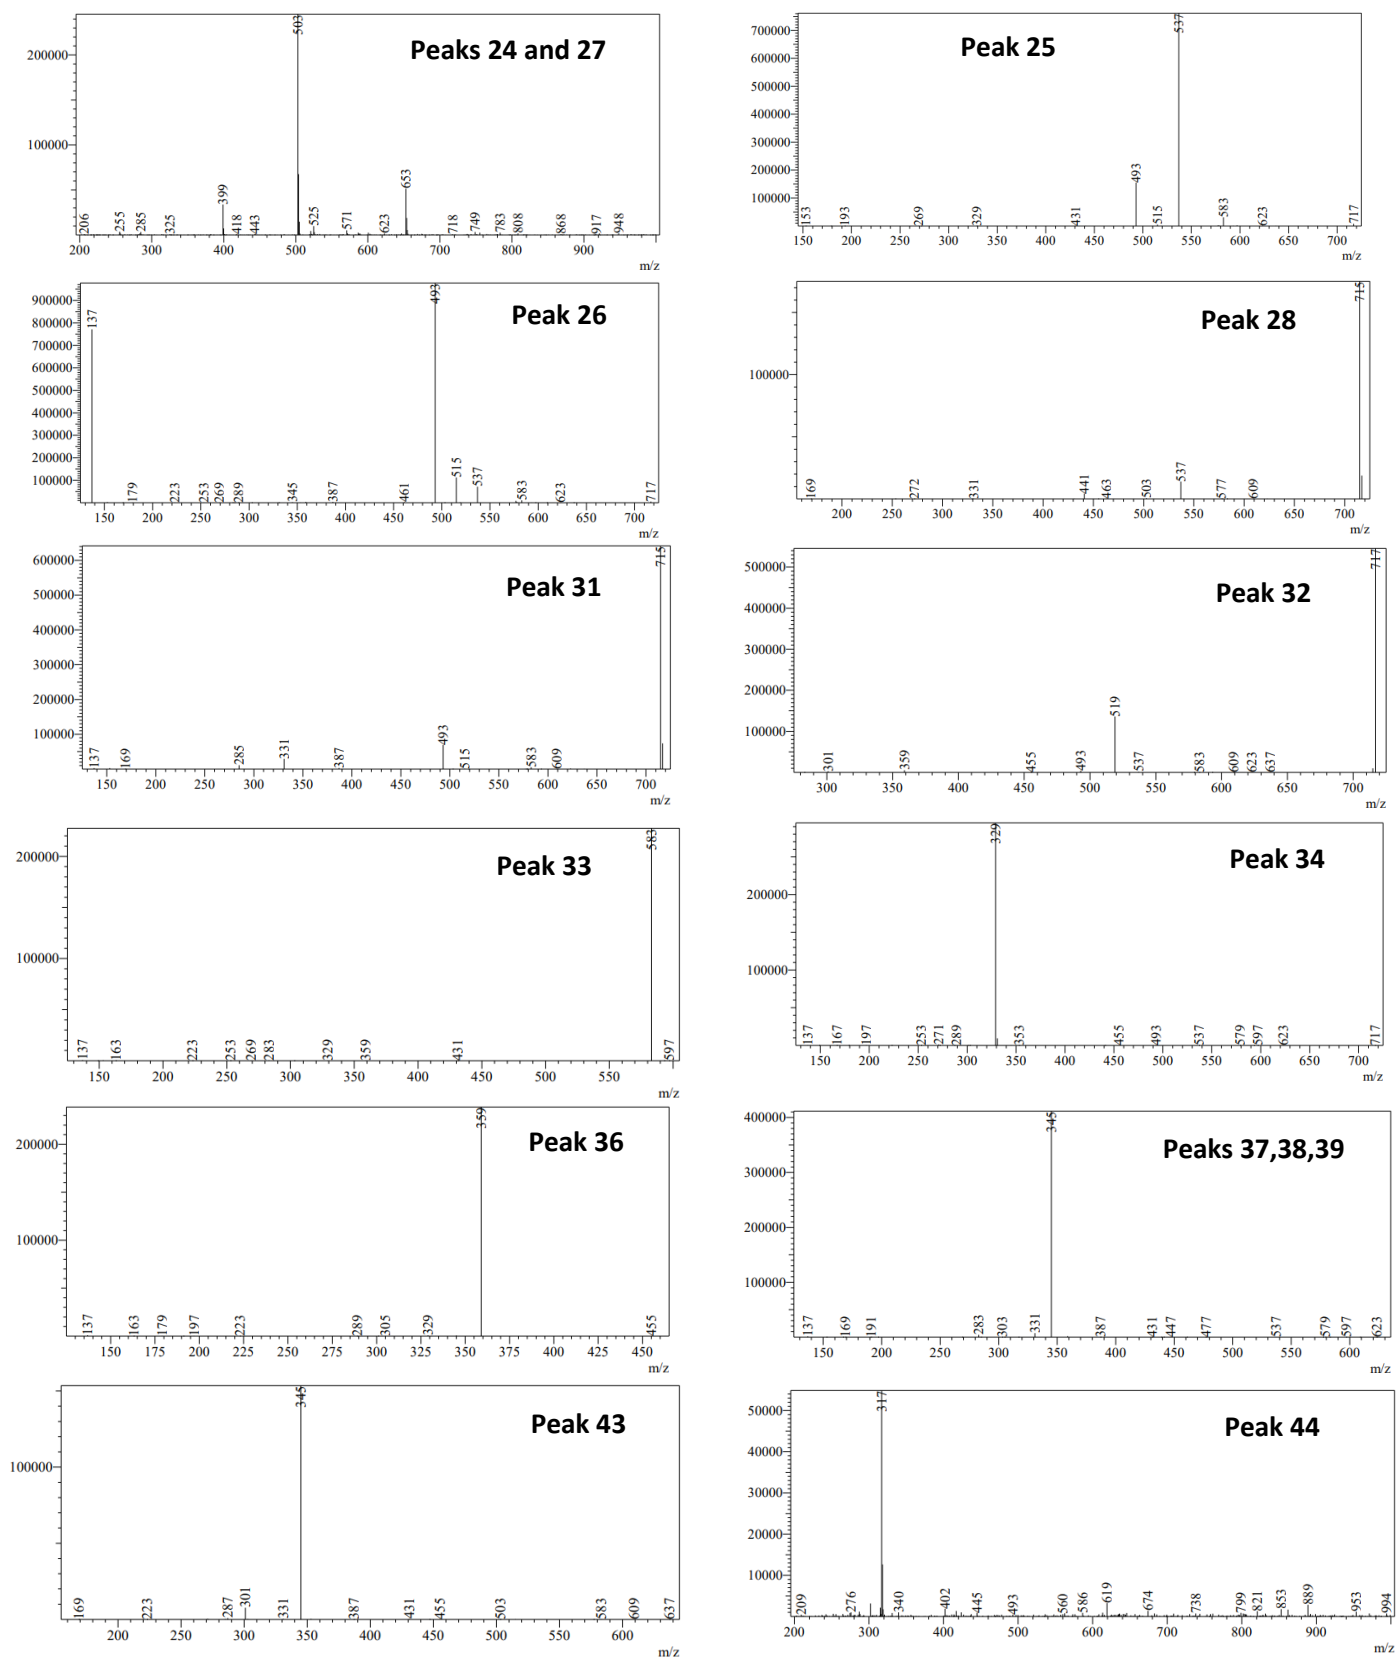

**Figure S2.** Mass spectra recorded in the negative ion mode of peaks identified by literature data.

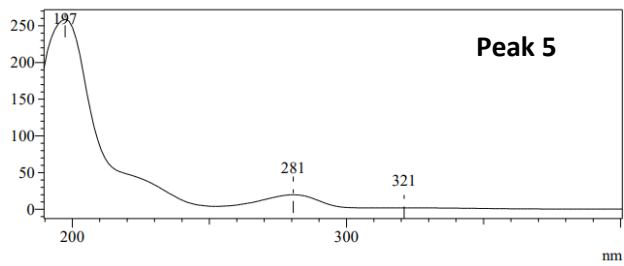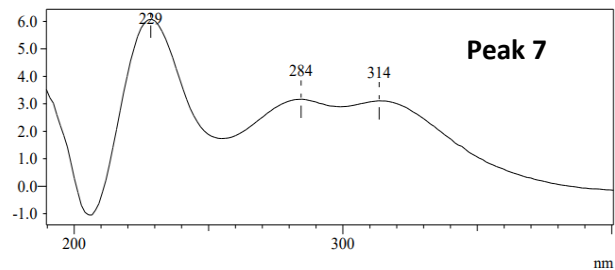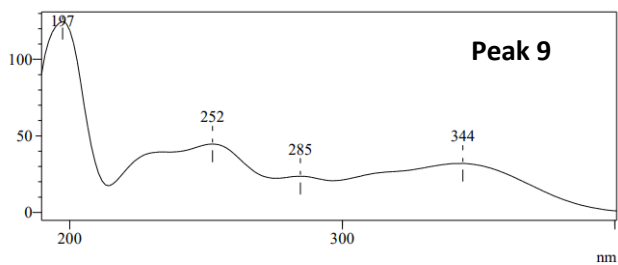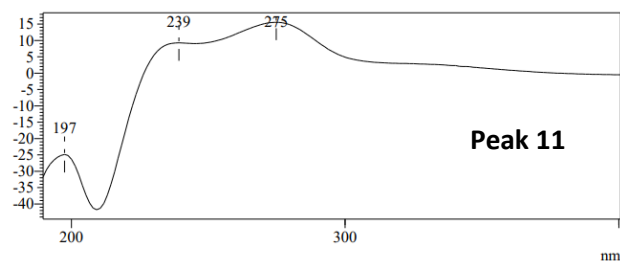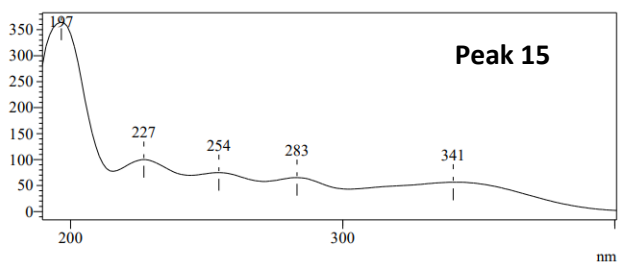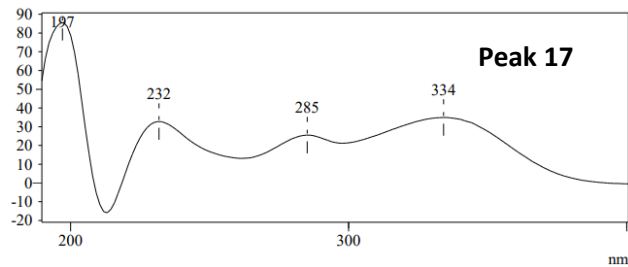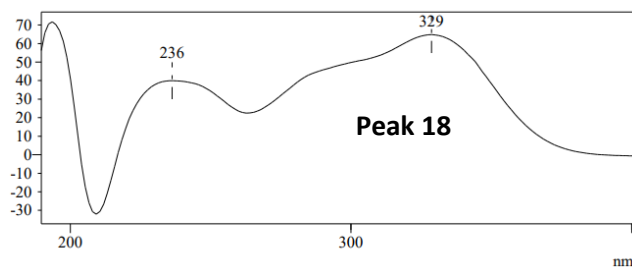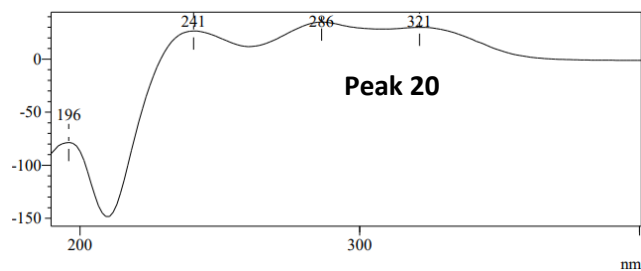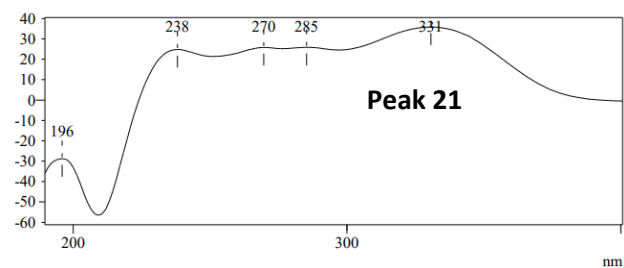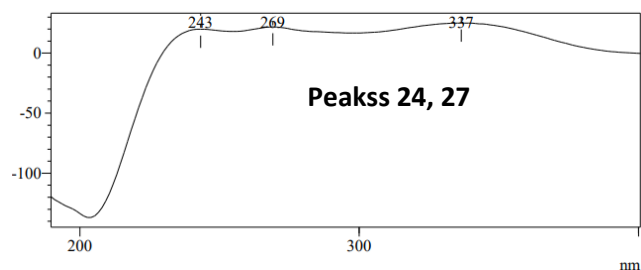

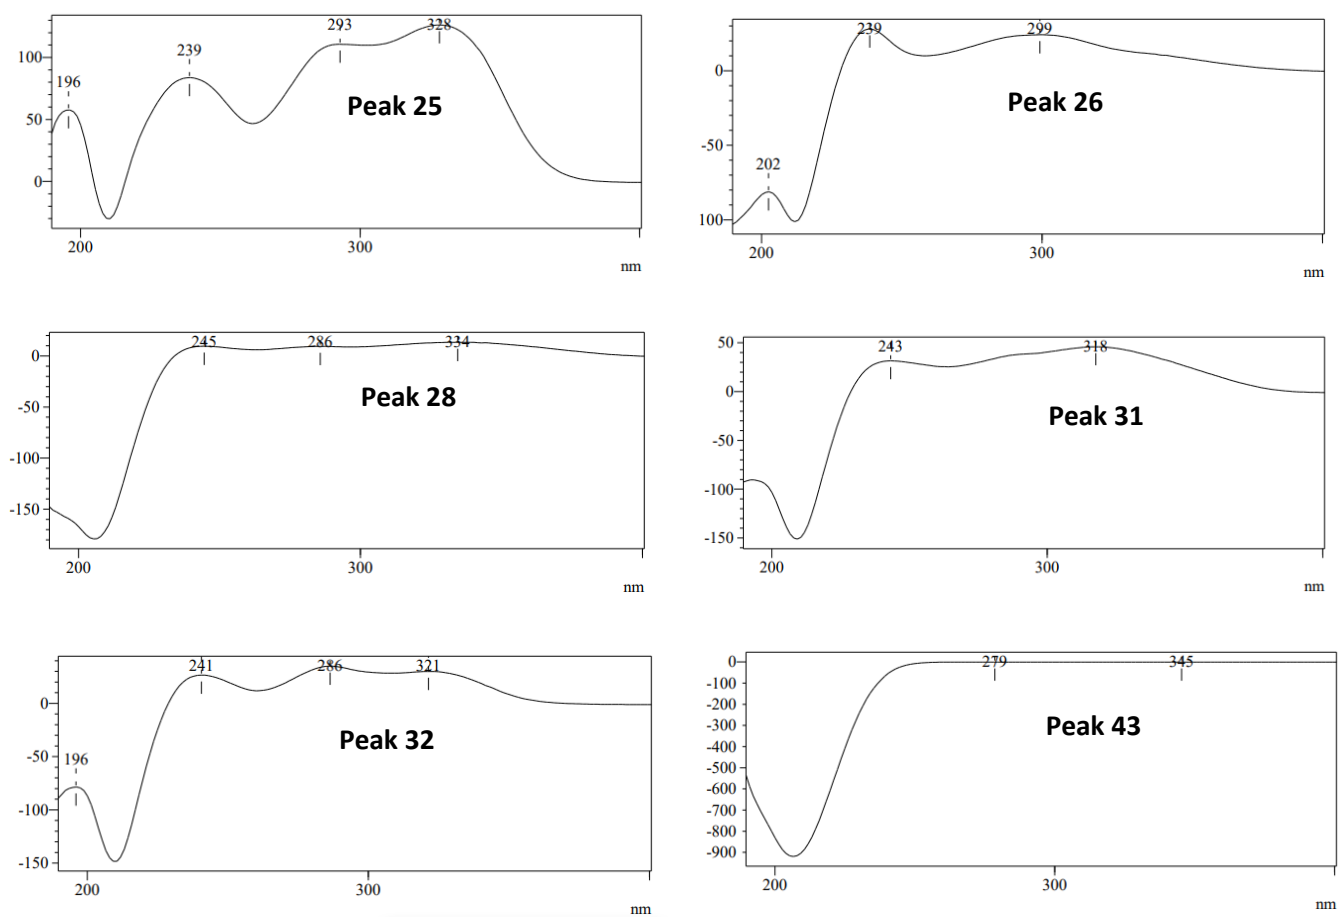

**Figure S3.** UV spectra of peaks identified by literature data.
